# Supplementary material for: Sequence-specific recognition of a coding segment of human DACH1 gene via short pyrimidine/purine oligonucleotides
Source: Royal Society of Chemistry journal article supplement (doi:10.1039/d1ra06604h), 2021-01-01
Supplement: d1ra06604h1.pdf [file d1ra06604h1.pdf]

### Supplimentary figure 1

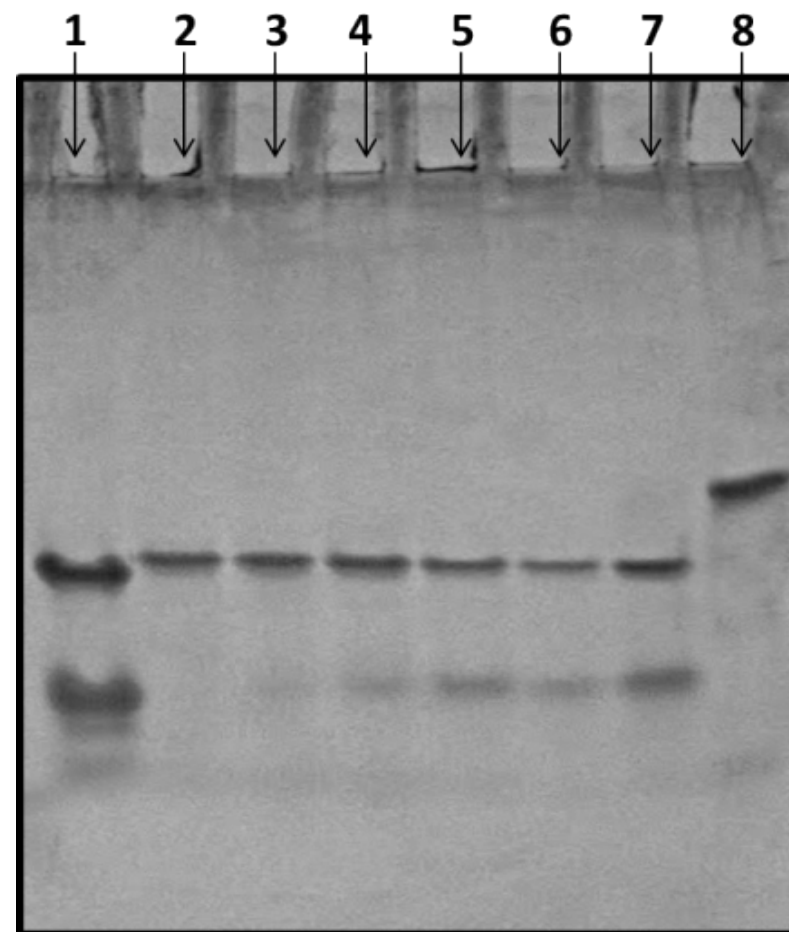

**Supplimentary Fig. 1:** 15 % native electropherogram of target duplex with Pu-TFO in 20 mM sodium cacodylate buffer with 100 mM Na<sup>+</sup> and 0.1 mM EDTA at pH 7.4. Lane 1 : PAL12 + PAL24, Lane 2 : SH27 + SH27c (Duplex), Lane 3 → 7 : Duplex + SH17Py (1 : 0.25 → 2) and Lane 8 : M35 + M35c.

## Supplimentary figure 2

### Multiple sequence alignment

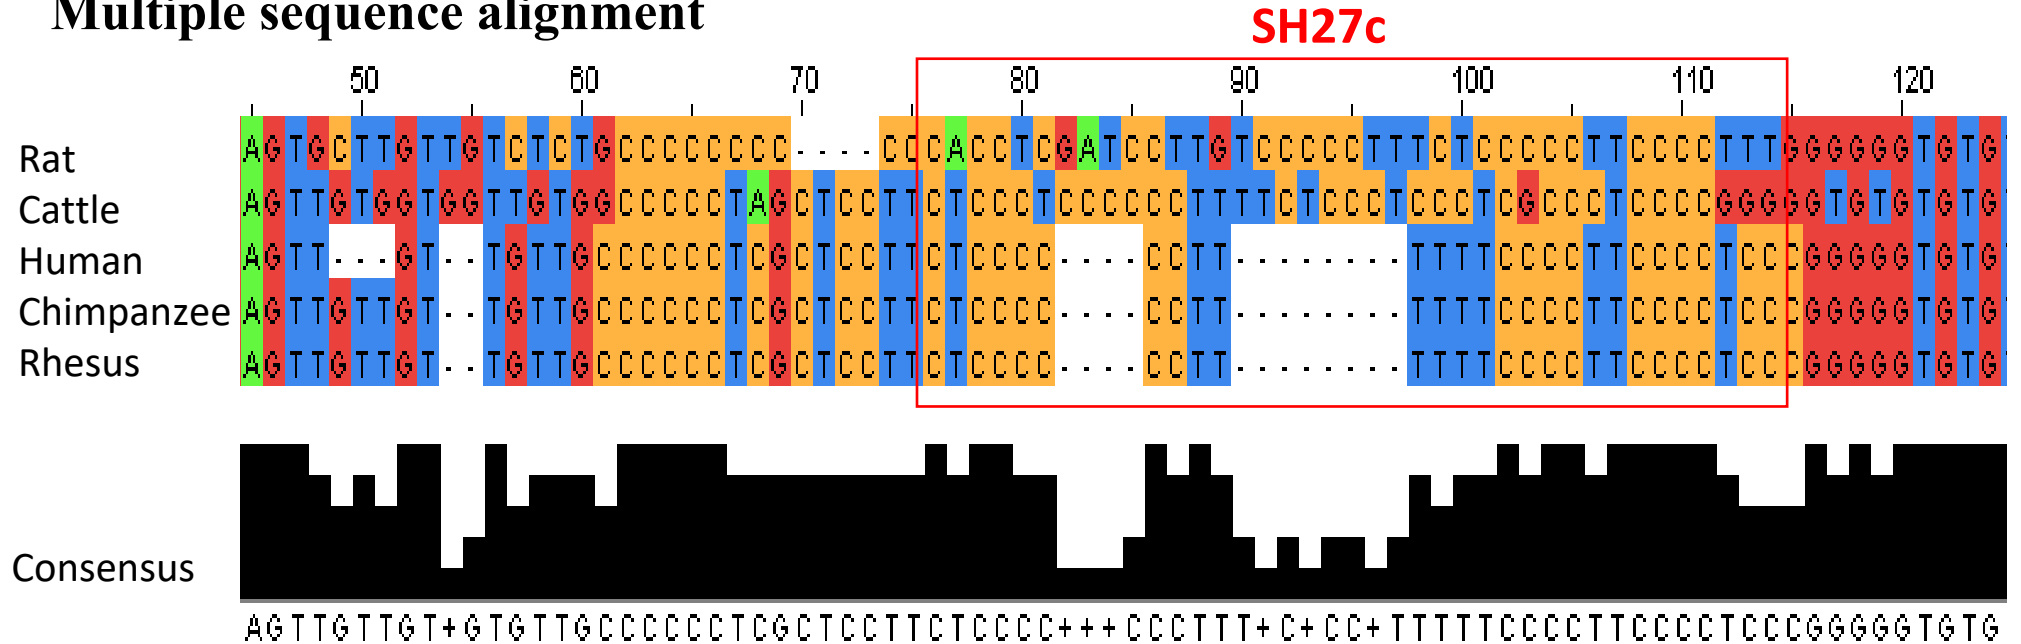

**Supplimentary Fig. 2:** Multiple Sequence Alignment of the counterpart of the purine rich 27-mer sequence.

### Supplimentary figure 3

#### Transcription factor binding sites

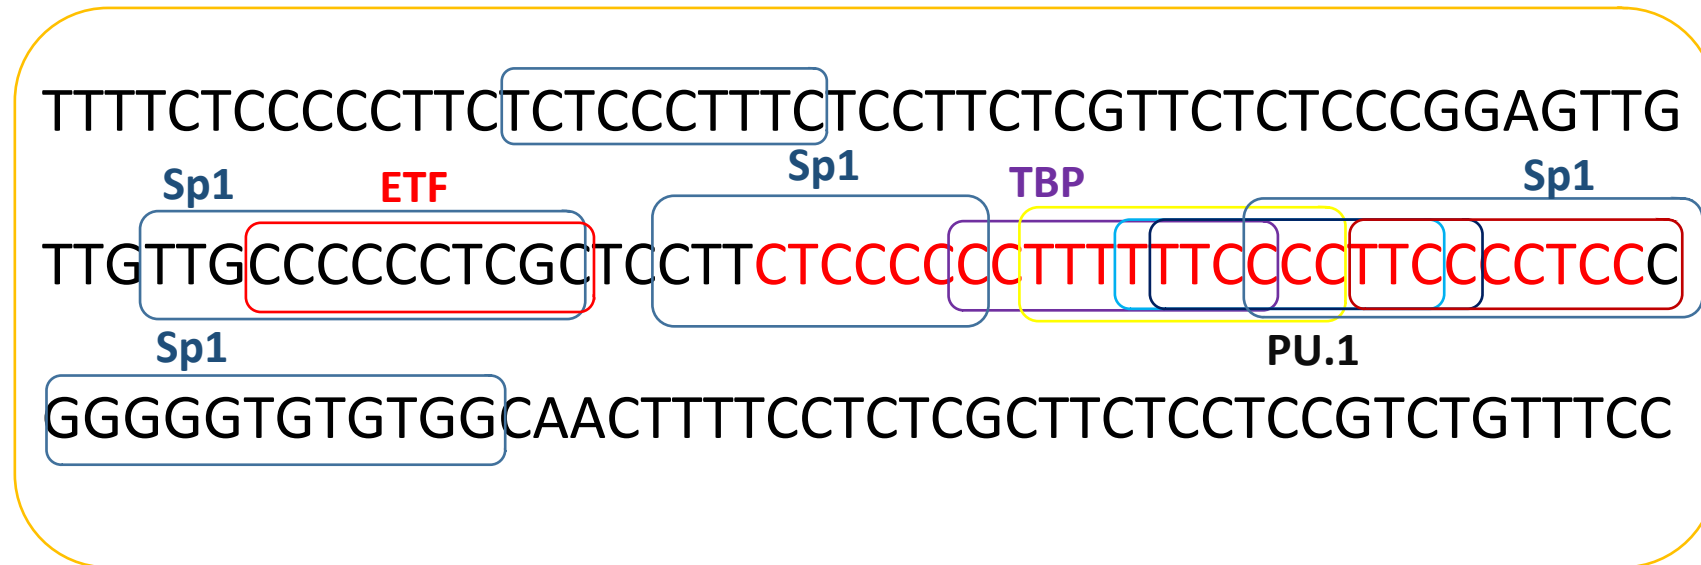

**Supplimentary Fig. 3:** Representation of Transcription factors bound or present in the vicinity of the target duplex.
